# Supplementary material for: Dragon boat exercise reshapes the temporal-spatial dynamics of the brain
Source: PeerJ journal article supplement (doi:10.7717/peerj.17623), 2024-06-28
Supplement: Original_Data.zip [file Original_Data.zip]

## Sheet: Sheet1
				AB	AC	AD	BA		BC	BD	CA	CB		CD	DA	DB	DC
		DataSet	OrgTM_1->1	OrgTM_1->2	OrgTM_1->3	OrgTM_1->4	OrgTM_2->1	OrgTM_2->2	OrgTM_2->3	OrgTM_2->4	OrgTM_3->1	OrgTM_3->2	OrgTM_3->3	OrgTM_3->4	OrgTM_4->1	OrgTM_4->2	OrgTM_4->3	OrgTM_4->4
		36		0.0895159	0.0479762	0.0740728	0.0871648		0.0692159	0.134638	0.045617	0.0696877		0.0656141	0.080406	0.13305	0.063518
		37		0.0820189	0.0657708	0.0071093	0.0766958		0.0291022	0.0522843	0.0729038	0.0285565		0.0488963	0.198083	0.0466287	0.0555455
		38		0.03566	0.189654	0.162415	0.0347528		0.0128629	0.0124852	0.188853	0.0134383		0.0672444	0.163676	0.0105484	0.0664622
		39		0.0827699	0.152204	0.0719782	0.0776672		0.0851457	0.0861283	0.16059	0.0728306		0.0655214	0.0673474	0.0339452	0.0611252
		40		0.0541914	0.187267	0.108511	0.0512429		0.0347335	0.0137335	0.186507	0.0294854		0.0833887	0.114488	0.0169421	0.078126
		43		0.0068217	0.091021	0.099687	0.00621311		0.011995	0.015943	0.0940281	0.0130808		0.0512185	0.0931136	0.0147452	0.261328
	PRE	44		0.0630698	0.028463	0.0387212	0.0617531		0.121525	0.151736	0.0257677	0.122455		0.0773098	0.042761	0.150992	0.077143
		45		0.0260226	0.0213383	0.100253	0.0303883		0.0402342	0.169902	0.026395	0.0410062		0.11169	0.089155	0.181395	0.113622
		46		0.190514	0.10182	0.0268829	0.189723		0.115849	0.089237	0.0991403	0.114741		0.0188945	0.0303784	0.0300785	0.0152424
		47		0.0930692	0.158595	0.07242	0.0944732		0.077215	0.131096	0.157583	0.0758849		0.0478039	0.0725595	0.0357017	0.0435228
amateur group		49		0.0633783	0.0346869	0.0891838	0.062336		0.0590043	0.146164	0.0412892	0.0561915		0.0892017	0.0868654	0.144874	0.0910126
		50		0.161338	0.136084	0.057629	0.163473		0.0679349	0.0793797	0.136831	0.0689657		0.0242733	0.0560441	0.0278609	0.0279588
		51		0.159431	0.0607717	0.0095527	0.165265		0.0418018	0.0688532	0.0590822	0.0438389		0.0349812	0.107972	0.0717325	0.0337848
		53		0.0634982	0.0869867	0.0033549	0.0646227		0.0203964	0.045234	0.0815193	0.0217247		0.0607845	0.20655	0.0442738	0.0582969
		54		0.118992	0.081925	0.0990239	0.123407		0.0614576	0.0675589	0.0802087	0.0635049		0.0507429	0.0955412	0.0716948	0.0489576
		55		0.0870458	0.0711242	0.0851545	0.0844702		0.0810407	0.0907821	0.0699234	0.0822304		0.0684985	0.0891934	0.0850188	0.0716685
		56		0.0842756	0.0209429	0.0478127	0.0797005		0.0931305	0.18469	0.0200584	0.0935375		0.0455783	0.0512928	0.179313	0.0467507
		57		0.193888	0.0472894	0.0556988	0.187281		0.0442496	0.0813425	0.051701	0.0413539		0.0203594	0.0969671	0.0773753	0.0225521
		58		0.0887508	0.0520598	0.0441765	0.0827644		0.138238	0.09412	0.0565683	0.133132		0.0656478	0.0457585	0.0937063	0.0644427
		59		0.0545392	0.0860782	0.0859869	0.0505018		0.0965486	0.0553411	0.0832537	0.096268		0.109426	0.0905478	0.0498812	0.108116
		62		0.0340101	0.0268914	0.0443331	0.0298148		0.0994813	0.143021	0.031695	0.098292		0.133692	0.0437411	0.140451	0.137234
		65		0.0523896	0.0511612	0.0921834	0.0504623		0.0173545	0.0887795	0.0482385	0.0195563		0.0806505	0.198256	0.0838564	0.0811304
		66		0.141666	0.148841	0.0203836	0.133891		0.141889	0.0142306	0.159343	0.130543		0.0170204	0.0209554	0.0140755	0.0164797
				0.0881242	0.0847371	0.0650663	0.0864376	#DIV/0!	0.0678437	0.0876817	0.0859607	0.0665351	#DIV/0!	0.0625408	0.0931153	0.0755713	0.0714791
				AB	AC	AD	BA		BC	BD	CA	CB		CD	DA	DB	DC
			OrgTM_1->1	OrgTM_1->2	OrgTM_1->3	OrgTM_1->4	OrgTM_2->1	OrgTM_2->2	OrgTM_2->3	OrgTM_2->4	OrgTM_3->1	OrgTM_3->2	OrgTM_3->3	OrgTM_3->4	OrgTM_4->1	OrgTM_4->2	OrgTM_4->3	OrgTM_4->4
	POST			0.0988332	0.13258	0.0586839	0.099895		0.10165	0.0373726	0.136246	0.100199		0.0493768	0.0531394	0.0396162	0.0520686
				0.0265813	0.0499667	0.0505286	0.0207855		0.0943222	0.099746	0.0521883	0.0936029		0.163755	0.0532599	0.0925126	0.164419
				0.0506285	0.0277218	0.155867	0.0834028		0.0234774	0.0410928	0.0254002	0.0257014		0.0504359	0.152775	0.140899	0.0517247
				0.0613693	0.0712161	0.07569	0.0957228		0.0884432	0.0867702	0.0753917	0.0866722		0.0595488	0.0764781	0.0804609	0.0630108
				0.0639771	0.0589686	0.108969	0.0640801		0.0590604	0.0976859	0.0640034	0.0611604		0.0890465	0.104224	0.0984963	0.0926217
				0.0221853	0.140507	0.0258927	0.0187434		0.119777	0.0834839	0.0416225	0.116795		0.189817	0.0282321	0.0855237	0.184402
				0.0221691	0.0550901	0.0785257	0.125929		0.0718479	0.0316353	0.0546827	0.0736665		0.0360316	0.0744335	0.119083	0.0348993
				0.0595194	0.0774021	0.0447367	0.0683309		0.14088	0.068707	0.0700166	0.155728		0.0821156	0.0471091	0.0628268	0.0870042
				0.0137138	0.0273311	0.0174116	0.0117026		0.12017	0.0351505	0.0242241	0.120281		0.208657	0.0227732	0.0912726	0.202761
				0.135727	0.0143961	0.2547	0.135143		0.00367875	0.0599892	0.0141151	0.00149122		0.00775389	0.251825	0.0619798	0.00776517
				0.0160094	0.0958572	0.0613717	0.119011		0.0895375	0.0711341	0.0855037	0.0953549		0.0463955	0.0687665	0.0645689	0.0462075
				0.0282281	0.181587	0.12119	0.0321784		0.0252253	0.0209217	0.182519	0.0261138		0.0988066	0.116576	0.0235567	0.10143
				0.0346251	0.0496595	0.100955	0.034644		0.0479429	0.118283	0.0506572	0.0429486		0.131298	0.101731	0.121691	0.123548
				0.0336566	0.0864566	0.041636	0.0335025		0.136038	0.0512421	0.086348	0.13044		0.133852	0.0377639	0.057719	0.129297
				0.041356	0.231758	0.136081	0.105729		0.0686592	0.0144196	0.225074	0.0748448		0.0285184	0.0347602	0.0155238	0.0276675
				0.075908	0.12645	0.0713691	0.0799078		0.0769715	0.0483035	0.121202	0.076991		0.0831409	0.0744407	0.0509676	0.0768164
				0.0370591	0.105234	0.100903	0.0367497		0.0487719	0.0529619	0.0999349	0.0433859		0.145033	0.102501	0.0578525	0.132213
				0.0571079	0.0216792	0.208404	0.1603		0.0124202	0.067807	0.0208638	0.00854311		0.011774	0.206954	0.0711096	0.00739219
				0.075903	0.062517	0.118384	0.0740782		0.0581998	0.0584265	0.0661146	0.0534192		0.0796898	0.118221	0.0913151	0.0762402
				0.0760199	0.126468	0.108333	0.0849105		0.0466089	0.0474125	0.113856	0.0506518		0.0744133	0.114447	0.0529995	0.0638063
				0.0121868	0.108725	0.243509	0.0154161		0.00478084	0.0109623	0.122502	0.00863257		0.0876268	0.228231	0.00907902	0.108283
				0.0833526	0.0697042	0.0705415	0.185598		0.0656376	0.0691801	0.0691833	0.0687854		0.0216332	0.0689465	0.064509	0.0257143
				0.136165	0.0460079	0.201854	0.132831		0.0127204	0.0641235	0.047083	0.0116898		0.0167976	0.19909	0.0638804	0.0178711
				0.0548818	0.085534	0.106762	0.0790692	#DIV/0!	0.0659487	0.0581222	0.0803797	0.0663956	#DIV/0!	0.0824138	0.101595	0.0703236	0.0816158
				AB	AC	AD	BA		BC	BD	CA	CB		CD	DA	DB	DC
			OrgTM_1->1	OrgTM_1->2	OrgTM_1->3	OrgTM_1->4	OrgTM_2->1	OrgTM_2->2	OrgTM_2->3	OrgTM_2->4	OrgTM_3->1	OrgTM_3->2	OrgTM_3->3	OrgTM_3->4	OrgTM_4->1	OrgTM_4->2	OrgTM_4->3	OrgTM_4->4
				0.0728156	0.0293395	0.0693882	0.070625		0.0797264	0.15702	0.0297086	0.0800972		0.0732446	0.0690497	0.159476	0.0716193
				0.0421813	0.0543637	0.0903337	0.0403203		0.0647675	0.0891295	0.0633805	0.0711123		0.135851	0.0817859	0.0785508	0.149878
				0.0625815	0.137726	0.0708968	0.02217		0.0550319	0.0242971	0.137781	0.0512735		0.169633	0.0680219	0.0288371	0.168328
				0.0561007	0.0907258	0.0804733	0.0567381		0.0802634	0.0723373	0.0887445	0.0845903		0.101026	0.0796741	0.0703114	0.103555
				0.0742381	0.090367	0.252527	0.0251576		0.0880053	0.0556247	0.0893273	0.0884928		0.167876	0.0554464	0.0570873	0.166943
				0.0639329	0.109789	0.0620661	0.204024		0.0591471	0.0288159	0.109624	0.0603608		0.0181416	0.0592188	0.0308937	0.0190376
				0.0587369	0.0543181	0.0856535	0.0606494		0.0992638	0.071069	0.0532377	0.194221		0.074988	0.0227699	0.0779852	0.0691998
				0.126063	0.0417556	0.0924344	0.121214		0.0660651	0.146167	0.039516	0.0675723		0.0428445	0.0689246	0.139409	0.0425621
				0.466566	0.0153936	0.0654897	0.162685		0.074665	0.170646	0.0141917	0.0760311		0.0131431	0.0381307	0.167599	0.0140746
				0.123553	0.0494176	0.0625849	0.227455		0.0607398	0.0661795	0.0511692	0.0566674		0.0193718	0.0581324	0.0702769	0.0168843
	PRE			0.022256	0.0578633	0.234911	0.0223686		0.0117545	0.0436579	0.0645966	0.0144846		0.101962	0.231307	0.0421685	0.107928
				0.0300077	0.0107725	0.0110255	0.0282437		0.0774832	0.193696	0.0114237	0.179944		0.0556036	0.0119336	0.190026	0.0552454
				0.0224725	0.0939846	0.0858558	0.0218555		0.0416084	0.0457801	0.0908823	0.0421541		0.192084	0.0891266	0.0462861	0.190231
				0.113257	0.141762	0.155267	0.11766		0.0887121	0.0358302	0.136928	0.0883618		0.0485052	0.0568649	0.0397101	0.0422709
professional group				0.128703	0.0615831	0.114898	0.133467		0.0508979	0.0855315	0.0641791	0.0529381		0.0330328	0.107853	0.0895416	0.0358028
				0.0314466	0.0454795	0.13352	0.0718223		0.0435123	0.118021	0.0451429	0.143771		0.0719129	0.0338594	0.11532	0.0707817
				0.0272524	0.0859649	0.0916564	0.0734029		0.0813982	0.0748391	0.0895018	0.0816204		0.0738136	0.0916285	0.0726478	0.0745732
				0.0453737	0.0208567	0.0854789	0.00321926		0.0134804	0.0622108	0.0239166	0.0151473		0.271718	0.0893397	0.0562634	0.278299
				0.0250334	0.0291012	0.094813	0.0271745		0.315439	0.0473428	0.0280055	0.311984		0.0580306	0.00552038	0.0508855	0.053258
				0.0769572	0.0249584	0.0748889	0.0878954		0.0654522	0.180465	0.0253133	0.0685019		0.0503709	0.0657182	0.187013	0.0534675
				0.0129105	0.0179429	0.116957	0.010502		0.138839	0.115549	0.0207269	0.138967		0.178206	0.0160297	0.113231	0.182051
				0.1916	0.120317	0.0822391	0.20308		0.0735346	0.0244591	0.108029	0.0853512		0.023199	0.0414145	0.0249621	0.0228294
				0.0646044	0.0677685	0.161615	0.0611276		0.0439758	0.0779933	0.0650446	0.039296		0.0704928	0.165771	0.0780535	0.0654101
				0.0625741	0.165012	0.0958912	0.0669187		0.0734412	0.0362153	0.156956	0.0825992		0.0775902	0.0690022	0.0320559	0.0762639
				0.083384										0.0884433	0.0698552	0.0841079	0.0887706
				AB	AC	AD	BA		BC	BD	CA	CB		CD	DA	DB	DC
			OrgTM_1->1	OrgTM_1->2	OrgTM_1->3	OrgTM_1->4	OrgTM_2->1	OrgTM_2->2	OrgTM_2->3	OrgTM_2->4	OrgTM_3->1	OrgTM_3->2	OrgTM_3->3	OrgTM_3->4	OrgTM_4->1	OrgTM_4->2	OrgTM_4->3	OrgTM_4->4
				0.107446	0.0200297	0.111969	0.113586		0.126695	0.176312	0.0210818	0.0270405		0.0630511	0.10786	0.180108	0.0337533
				0.0121682	0.0571586	0.0956381	0.0148427		0.129844	0.0452327	0.0558275	0.0274604		0.238954	0.0957552	0.0484393	0.236656
	POST			0.0370375	0.0354582	0.0512461	0.0362099		0.101531	0.132749	0.0365407	0.10228		0.124951	0.0496924	0.130281	0.123186
				0.0659267	0.0521894	0.07155	0.062811		0.0768082	0.115464	0.0551175	0.0756746		0.101688	0.0711705	0.110336	0.103804
				0.0598052	0.12179	0.0762614	0.0593961		0.07518	0.0470073	0.125792	0.075421		0.0962231	0.0759989	0.048149	0.100803
				0.0865099	0.126972	0.0928352	0.0983741		0.057224	0.0440291	0.118055	0.063908		0.0720454	0.089592	0.0475846	0.0697646
				0.147891	0.104692	0.0980995	0.0477848		0.0659987	0.0589099	0.11072	0.0664408		0.105612	0.0922991	0.0589147	0.1112
				0.0915474	0.0323451	0.120077	0.0318411		0.123373	0.113588	0.033302	0.029145		0.154295	0.116918	0.107248	0.15985
				0.107618	0.0504918	0.096293	0.100084		0.15782	0.111977	0.058198	0.0569284		0.0594429	0.0951312	0.104516	0.0652563
				0.0372396	0.155116	0.268084	0.0330987		0.0604515	0.0358496	0.149157	0.0642076		0.127343	0.075705	0.0268694	0.125871
				0.18369	0.0533569	0.102362	0.0790928		0.158166	0.10969	0.0621185	0.0575828		0.0725125	0.100138	0.107122	0.0795316
				0.0777707	0.12417	0.0319043	0.0787337		0.104902	0.045585	0.123204	0.110606		0.0916297	0.0312045	0.0426291	0.096392
				0.180636	0.0260865	0.0940735	0.15513		0.0402153	0.141188	0.0269529	0.0395348		0.0878501	0.0878173	0.14659	0.0281305
				0.0614039	0.0446882	0.0846708	0.059867		0.0565208	0.118276	0.0419608	0.055924		0.117962	0.088281	0.11611	0.117264
				0.176061	0.0184402	0.0534381	0.0144187		0.0569751	0.166257	0.0227278	0.0552899		0.161325	0.0529178	0.166059	0.161794
				0.0128579	0.0145981	0.0243576	0.0120841		0.097099	0.170346	0.0121869	0.101019		0.161078	0.0274098	0.164454	0.16555
				0.153051	0.0290265	0.832969	0.0563817		0.106532	0.163393	0.0274928	0.103965		0.0949105	0.0316031	0.172279	0.0911299
				0.146692	0.113206	0.0734595	0.0530314		0.0814619	0.0535855	0.109996	0.0842802		0.109977	0.0682117	0.0590369	0.107596
				0.0463818	0.0842325	0.0863584	0.0464991		0.06202	0.0849094	0.0784958	0.0656969		0.11881	0.0917359	0.0798146	0.118134
				0.111161	0.0685379	0.0786918	0.114517		0.0761466	0.0847186	0.0689882	0.0776691		0.0575539	0.0750439	0.0881708	0.0601003
				0.0340455	0.0752989	0.105984	0.0315714		0.150152	0.0592098	0.0782529	0.0439197		0.159559	0.105968	0.063989	0.154882
				0.0846252	0.13559	0.0512145	0.0908677		0.0902028	0.0524173	0.127534	0.094332		0.0678958	0.0535812	0.0535556	0.063325
				0.0241791	0.119518	0.0556555	0.0228437		0.0699983	0.035381	0.119238	0.0686333		0.176903	0.0567205	0.0339579	0.176853
				0.0780265	0.117166	0.0358768	0.0175773		0.0810975	0.0314524	0.112596	0.077167		0.189937	0.0418254	0.0337525	0.178627
				0.0884905										0.117146	0.0742742	0.0912486	0.113727
